1                   **Spatiotemporal manipulation of the mismatch repair system**  
2                   **of *Pseudomonas putida* accelerates phenotype emergence**

3  
4                   Lorena Fernández-Cabezón, Antonin Cros and Pablo I. Nikel\*

5  
6                   The Novo Nordisk Foundation Center for Biosustainability, Technical University of Denmark,  
7                   2800 Kongens Lyngby, Denmark

8  
9   **Keywords:**                *Pseudomonas putida*; Mismatch repair system; Mutagenesis; Synthetic  
10                                biology; Metabolic engineering; Evolution

11   **Running title:**         Synthetic mutator devices for phenotypic evolution

12  
13  
14   \* Correspondence to:        Pablo I. Nikel (pabnik@biosustain.dtu.dk)  
15                                The Novo Nordisk Foundation Center for Biosustainability,  
16                                Technical University of Denmark  
17                                Lyngby, Denmark  
18                                Tel: (+45 93) 51 19 18

19  
20  
21   Submitted on January 22nd, 2021.

## 1 ABSTRACT

---

2  
3  
4  
5  
6  
7  
8  
9  
10  
11  
12  
13  
14  
15  
16  
17  
18  
19

Developing complex phenotypes in industrially-relevant bacteria is a major goal of metabolic engineering, which encompasses the implementation of both rational and random approaches. In the latter case, several tools have been developed towards increasing mutation frequencies—yet the precise spatiotemporal control of mutagenesis processes continues to represent a significant technical challenge. *Pseudomonas* species are endowed with one of the most efficient DNA mismatch repair (MMR) systems found in bacteria. Here, we investigated if the endogenous MMR system could be manipulated as a general strategy to artificially alter mutation rates in *Pseudomonas* species. To bestow a conditional mutator phenotype in the platform bacterium *Pseudomonas putida*, we constructed inducible mutator devices to modulate the expression of the dominant-negative *mutL*<sup>E36K</sup> allele. Regulatable overexpression of *mutL*<sup>E36K</sup> in a broad-host-range, easy-to-cure plasmid format resulted in a transitory inhibition of the MMR machinery, leading to a significant increase (up to 438-fold) in mutation frequencies and a heritable fixation of genome mutations. Following such accelerated mutagenesis-followed-by selection approach, three phenotypes were successfully evolved: resistance to antibiotics streptomycin and rifampicin and reversion of a synthetic uracil auxotrophy. Thus, these mutator devices could be applied to accelerate evolution of metabolic pathways in long-term evolutionary experiments, alternating cycles of (inducible) mutagenesis coupled to selection schemes.

## 1 INTRODUCTION

---

2  
3 Systems metabolic engineering and synthetic biology guide the development of microbial cell factories  
4 (MCFs) capable of converting renewable raw materials into value-added compounds<sup>1-4</sup>. However, low  
5 productivities and product yields by most MCFs, even after comprehensive optimization of biosynthetic  
6 pathways, continue to make the implementation of economically-viable bioprocesses difficult at an  
7 industrial scale<sup>5</sup>. Low product yields are often caused by a decrease in cell viability and genetic  
8 instability of MCFs under industrially-relevant production conditions<sup>6-7</sup>. For instance, the presence of  
9 growth inhibitors in renewable raw materials (e.g. crude glycerol and biomass hydrolysates) and the  
10 accumulation of toxic compounds during fermentation (including metabolic intermediates and target  
11 products) are known to negatively impact cell survival<sup>8-10</sup>.

12  
13 Adaptive laboratory evolution (ALE), also known as *evolutionary engineering*, is a valuable tool to  
14 improve complex phenotypic traits that can be coupled with microbial growth (e.g. tolerance to  
15 inhibitors, substrate utilization, growth temperature)<sup>11-13</sup>. At its core, ALE involves the extended  
16 propagation of a microbial strain or population, typically for hundreds of generations, in the presence of  
17 a desired selective pressure. Mutants that accumulate beneficial mutations will occasionally emerge and  
18 expand within the population over time. Selected mutants displaying enhanced phenotypes can be  
19 subsequently characterized and sequenced towards reverse engineering<sup>11-16</sup>. Unlike purely rational  
20 approaches, ALE facilitates the identification of non-intuitive beneficial mutations that occur in a variety  
21 of genes in parallel without requiring any knowledge of underlying genetic mechanisms.

22  
23 Since intrinsic DNA mutation rates are typically very low (ranging in the order of  $10^{-9}$ – $10^{-10}$  per base  
24 pair per generation)<sup>17-18</sup>, small and transient increases in mutation frequency can significantly improve  
25 the accumulation of beneficial mutations in microbial populations<sup>13,19</sup>. This rationale has been applied to  
26 certain ALE experiments in which the genetic diversity of a microbial population was increased before  
27 and/or during growth under restrictive culture conditions<sup>6,16,20-21</sup>. Chemical and/or physical mutagenesis  
28 techniques have been traditionally used due to their simplicity and wide applicability<sup>22-23</sup>, but other  
29 genome-wide random mutagenesis techniques can be also applied for this purpose<sup>6</sup>. Mutator strains,  
30 i.e. bacteria displaying higher mutation rates, frequently have mutations in one or several genes  
31 encoding DNA repair or error-avoidance systems<sup>24</sup>. Most bacteria control DNA substitution rates

1 through overlapping DNA repair mechanisms, subdivided into three main categories: (i) base selection,  
2 (ii) proofreading and (iii) mismatch repair (MMR)<sup>25</sup>. Base selection encompasses the discrimination  
3 between correct and incorrect nucleotides by DNA polymerase, while proofreading is the subsequent  
4 editing of the newly incorporated nucleotide by a 3'→5' exonuclease activity that hydrolyzes incorrect  
5 bases. Following replication, newly replicated DNA is checked by a MMR system that recognizes and  
6 corrects mismatches resulting from replication errors<sup>25</sup>. Specific mutations in components of MMR (e.g.  
7 *mutL* and *mutS*) or in proofreading DNA polymerases (e.g. *dnaQ*), as well as the overexpression of  
8 certain dominant-negative mutator alleles of the same genes, have been shown to result in mutator  
9 phenotypes<sup>24,26</sup>. Conditional mutator phenotypes have been applied to the phenotypic optimization of  
10 MCFs over time<sup>27-32</sup>. However, a major problem of these conditional phenotypes is the relatively low  
11 control of spatiotemporal activity afforded by the cognate devices. A typical problem of these systems is  
12 that the ability of effectively halting mutagenesis is limited, and the cells will continue to mutate even  
13 after a desired phenotype is achieved<sup>33</sup>.

14

15 *Pseudomonas putida* is a ubiquitous Gram-negative bacterium used for biotechnological and  
16 bioremediation applications<sup>34-37</sup>. Strain KT2440, for instance, is a promising microbial *chassis* for  
17 handling the synthesis of difficult-to-produce chemicals involving harsh reactions and complex  
18 biochemistries<sup>36-40</sup>. Alas, metabolic engineering of *P. putida* still relies largely on trial-and-error  
19 approaches. While advanced genome-wide engineering tools are being constantly developed and  
20 optimized<sup>41-44</sup>, complex phenotypes are the result of multi-level regulatory layers that are often difficult  
21 to design from first principles. ALE has recently started to be exploited in *P. putida*-based MCFs<sup>45-50</sup>. On  
22 this background, we set out to explore if genome-wide mutation rates in *P. putida* (both wild-type strain  
23 and reduced-genome derivatives thereof) could be increased by synthetic control of the well-  
24 characterized MMR in this bacterium<sup>51</sup>. To this end, in this work we have designed a toolbox to  
25 conditionally increase mutation rates in Gram-negative bacteria by specifically interfering with the  
26 endogenous MMR system towards accelerating the evolution of specific phenotypes. Moreover, we  
27 focused on the adoption of emerging strategies to easily cure plasmid-born mutator devices from  
28 bacterial populations, such that the temporal window of increased mutagenesis rates can be externally  
29 controlled. The application of this set of synthetic mutator devices has been systematically validated in  
30 evolution experiments targeting both antibiotic resistance and growth phenotypes *via* auxotrophy  
31 reversion.

## 1 RESULTS AND DISCUSSION

---

### 3 Construction of broad-host-range, plasmid-based mutator devices to increase DNA mutation

4 rates. *Pseudomonas* species have been shown to display one of the highest MMR efficiencies found in  
5 bacteria (e.g. *P. fluorescens*<sup>52</sup>). Therefore, we hypothesized that manipulating the endogenous MMR  
6 system could be a straightforward approach to increase the mutation rate in bacterial species of the  
7 *Pseudomonas* genus. In order to bestow a conditional mutator phenotype in our model bacterium *P.*  
8 *putida*, we constructed two inducible mutator devices, based on well-characterized expression systems,  
9 to tightly modulate the expression of the mutator allele *mutL*<sup>E36K</sup> from *P. putida*<sup>51</sup> (Fig. 1 and Fig. S1 in  
10 the Supporting Information). The E36K amino acid change in MutL stems from a 106(G→A) mutation in  
11 the corresponding allele (Fig. S1). The overexpression of the homologous, dominant-negative allele  
12 *mutL*<sup>E32K</sup> from *Escherichia coli* has been shown to result in a transitory inhibition of the MMR  
13 machinery<sup>26,53</sup>, which leads to the heritable fixation of mutations in the genome by tampering with the  
14 MMR system (Fig. 1a). The *mutL*<sup>E36K</sup> allele, in contrast, has been exploited for genome engineering  
15 approaches specifically developed for *P. putida* and related species<sup>54</sup>. In our mutator devices, the  
16 expression of *mutL*<sup>E36K</sup> was driven from two tightly-regulated expression systems, i.e. the  
17 thermoinducible *cl857/P<sub>L</sub>* expression system from the bacteriophage  $\lambda$  and the cyclohexanone-inducible  
18 *ChnR/P<sub>chnB</sub>* system from *Acinetobacter johnsonii*. Both expression vectors have been previously  
19 employed for heterologous gene expression in Gram-negative bacteria such as *E. coli* or *P. putida*<sup>55-58</sup>.  
20 Thus, the *mutL*<sup>E36K</sup> gene was cloned into vectors pSEVA2514 (*cl857/P<sub>L</sub>*) and pSEVA2311 (*ChnR/P<sub>chnB</sub>*)  
21 to yield the mutator plasmids pS2514M and pS2311M, respectively (Fig. 1b). By adopting the rules set  
22 in the *Standard European Vector Architecture* (SEVA) platform<sup>59</sup>, the subsequent transfer of the mutator  
23 devices and plasmids developed herein to various bacterial hosts is greatly facilitated. Moreover, the  
24 implementation of these two expression systems enables the user to decide whether induction of the  
25 system can be done by a temperature shift (to 40°C) or addition of chemicals to the culture medium  
26 (cyclohexanone). These two approaches were selected as the first one (*cl857/P<sub>L</sub>*) relies on relieving the  
27 transcriptional repression mediated by the *cl857* protein when it gets degraded at 40°C, whereas the  
28 *ChnR/P<sub>chnB</sub>* system acts *via* direct activation of the transcriptional response upon addition of the small-  
29 molecule inducer (Fig. 1c).

1 **Emergence of antibiotic resistance phenotypes in *P. putida* carrying synthetic mutator devices.**

2 To investigate the functionality of the mutator devices, the occurrence of antibiotic-resistant mutants  
3 was assessed in bacterial cultures grown in liquid medium. Two types of antibiotic resistance were  
4 selected to this end, namely, rifampicin (Rif) and streptomycin (Str), and the systems were firstly  
5 calibrated with the wild-type strain KT2440. In these experiments, control strains (i.e. *P. putida*  
6 KT2440/pSEVA2514 and KT2440/pSEVA2311) and their derivatives carrying the conditional mutator  
7 devices (i.e. *P. putida* KT2440/pS2514M and KT2440/pS2311M) were cultured at 30°C in non-selective  
8 M9 minimal medium containing glucose, and subjected to a mutagenesis protocol as indicated in **Fig. 2**  
9 and *Methods*. In the case of strains carrying vectors with the *cl857/P<sub>L</sub>* expression system, cultures were  
10 shifted at 40°C for 15 min for induction; whereas cyclohexanone was added at 1 mM in cultures of the  
11 strains transformed with vectors bearing the *ChnR/P<sub>chnB</sub>* system. Cultures were re-incubated at 30 °C,  
12 after temporally inducing a mutator phenotype, and were stopped at different phases of bacterial growth  
13 (i.e. early-exponential, mid-exponential or stationary phase) to assess the appearance of the target  
14 phenotypes.

15

16 The occurrence of mutants developing resistance to either Rif or Str was investigated in the bacterial  
17 populations after the treatments indicated above. Resistance to these antibiotics has been widely used  
18 for the investigation of spontaneous and induced mutagenesis processes in Gram-negative bacteria<sup>60-</sup>  
19 <sup>62</sup>. Rifampin-resistant (Rif<sup>R</sup>) and streptomycin-resistant (Str<sup>R</sup>) phenotypes occur due to the appearance  
20 of mutations in the *rpoB* and *rpsL* genes, encoding the  $\beta$ -subunit of RNA polymerase and the 30S  
21 ribosomal protein S12, respectively<sup>60-63</sup>. Mutation frequencies were estimated by assessing the  
22 frequency of occurrence of Rif<sup>R</sup> or Str<sup>R</sup> cells on the total number of viable cells in the bacterial  
23 population for each tested experimental condition (**Fig. 3**). In all accelerated mutagenesis experiments,  
24 we observed a significantly higher number of Rif<sup>R</sup> and Str<sup>R</sup> mutants isolated in selective conditions in  
25 bacterial clones carrying a mutator device compared to their respective control strains (**Fig. 3**). A visual  
26 example of this general trend is presented in **Fig. S2** in the Supporting Information. The number of Rif<sup>R</sup>  
27 and Str<sup>R</sup> colonies present in 5 mL of non-diluted cultures of *P. putida* KT2440/pSEVA2311 (plated after  
28 concentrating the biomass by centrifugation and resuspension) was roughly similar to that in selective  
29 plates seeded with only 100  $\mu$ L of an undiluted culture of *P. putida* KT2440/pS2311M. When these  
30 differences were properly quantified, we observed that the frequency of appearance of Rif<sup>R</sup> and Str<sup>R</sup>  
31 mutants in *P. putida* KT2440/pS2311M was 438- and 10-fold higher, respectively, as compared to the

1 control strain when the induction of the expression system was stopped in early-exponential growth  
2 phase (**Fig. 3a**). In the same experimental conditions, the frequency of occurrence of Rif<sup>R</sup> and Str<sup>R</sup>  
3 mutants in *P. putida* KT2440/pS2514M was 45- and 14-fold higher compared to the control strain,  
4 respectively (**Fig. 3b**). Similar relative mutation frequencies were observed when the cultures of the  
5 different recombinant strains were prolonged until reaching mid-exponential and stationary phase (**Fig.**  
6 **3**). The largest differences in mutation frequencies were observed in actively-growing cells (i.e. during  
7 the early- or mid-exponential phase of growth) as compared to bacteria harvested during the stationary  
8 phase<sup>64-66</sup>.

9  
10 Taken together, these experimental data demonstrate the functionality of the mutator devices developed  
11 in this work to temporarily increase the global mutation rate in *P. putida*. The differences detected in the  
12 mutation frequencies as elicited by the two mutator devices may be related to intrinsic properties of  
13 each of the plasmids that carry the mutator allele (e.g. origin of replication and promoter used, since this  
14 will affect the transcriptional output), as well as to the protocols followed to induce the expression of  
15 *mutL*<sup>E36K</sup>. Moreover, differences in mutation frequencies are known to arise depending on the method  
16 used for their estimation (i.e. counting the occurrence of Rif<sup>R</sup> or Str<sup>R</sup> clones). On the one hand, mutation  
17 frequencies and the actual spectrum of mutations have been shown to vary at different chromosomal  
18 positions in several bacterial species, including *P. putida*<sup>67-69</sup>. Other genetic factors, such as the  
19 orientation of the target gene in the replication fork, its level of transcription and/or the immediately  
20 flanking nucleotides can also influence the mutation frequency<sup>67-68</sup>. On the other hand, the nature of the  
21 mutations acquired by *rpoB* and *rpsL* has been demonstrated to lead to distinct levels of resistance to  
22 both Rif and Str, which makes it difficult to use these phenotypes for a direct, quantitative estimation of  
23 global mutation rates in different bacterial strains. Factors such as the time and temperature of  
24 incubation in selective medium (i.e. agar plates supplemented with antibiotic) have been also shown to  
25 dramatically affect the estimation of mutation frequencies (e.g. due to the appearance of colonies with  
26 uneven sizes)<sup>62</sup>. Therefore, the utilization of alternative phenotypes is highly recommendable for the  
27 calibration and validation of our mutator tool. This issue was undertaken as explained in the next  
28 section.

29  
30 **Reversion of a uracil auxotrophy in *P. putida* using mutator devices.** To further calibrate the  
31 mutator vectors and gain insight into growth phenotypes beyond antibiotic resistance, we investigated

1 the reversion of uracil auxotrophy of the *P. putida pyrF* HM (Table 1). This strain is a derivative of  
2 reduced-genome *P. putida* EM42 carrying a 163(A→T) mutation in *pyrF*, which results in a Lys55STOP  
3 change in the PyrF protein<sup>70</sup>. This change, in turn, leads to abortive translation of the cognate mRNA  
4 and the strain thus lacks a functional orotidine 5'-phosphate decarboxylase (i.e. Ura<sup>-</sup> phenotype), an  
5 essential activity for bacterial growth on minimal medium. In these experiments, the control strains, i.e.  
6 *P. putida pyrF* HM/pSEVA2514 and *pyrF* HM/pSEVA2311, and the conditional mutator strains, i.e. *P.*  
7 *putida pyrF* HM/pS2514M and *pyrF* HM/pS2311M, were cultured at 30°C in non-selective medium (i.e.  
8 with uracil supplementation) and subjected to the mutagenesis protocol indicated in Fig. 2. After  
9 treatment, the cultures were re-incubated at 30 °C, and were harvested upon a doubling in the  
10 population size (i.e. early-exponential phase). The emergence of uracil prototrophic mutants (Ura<sup>+</sup>) in  
11 the evolved bacterial populations was determined by seeding M9 minimal medium agar plates with  
12 glucose but without uracil supplementation. Mutation frequencies were estimated by assessing the  
13 frequency of occurrence of Ura<sup>+</sup> mutants on the total number of viable cells in the population for each  
14 tested experimental condition (Fig. 4a). A significant higher number of Ura<sup>+</sup> mutants were isolated from  
15 the bacterial populations carrying the conditional mutator devices as compared to their respective  
16 control strains, again validating the functionality of the mutator tools. In fact, we only isolated a  
17 negligible number (0-4) of spontaneous Ura<sup>+</sup> mutants in bacterial populations of control strains under  
18 these experimental conditions. Under these conditions, the devices borne by the mutator plasmids  
19 pS2311M and pS2514M mediated an increase in the relative mutation frequency of 51- and 384-fold,  
20 respectively, as compared to control conditions. Interestingly, in this case no significant differences were  
21 found when comparing mutation frequencies estimated for the cyclohexanone inducible and  
22 thermoinducible mutator systems (i.e. 750 and 860 Ura<sup>+</sup> mutants per 10<sup>9</sup> viable cells, respectively, Fig.  
23 4a). The next objective in this experiment was studying the nature of the mutations acquired by the Ura<sup>+</sup>  
24 clones.

25

### 26 **The conditional mutator phenotype favors the emergence of transition mutations in the genome.**

27 To investigate the nature of the mutations introduced with the mutator devices, the whole *pyrF* gene  
28 (*PP\_1815*) was amplified by high-fidelity PCR from several Ura<sup>+</sup> clones and the resulting amplicons  
29 were sent for sequencing (Fig. 4b). Firstly, we isolated multiple Ura<sup>+</sup> mutants from two independent  
30 evolution experiments performed with the conditional mutator strains (i.e. *P. putida pyrF* HM/pS2514M  
31 and *pyrF* HM/pS2311M). The DNA transitions 164(A→G) or 163(T→C), which eliminate the premature



1 *STOP* codon in the *pyrF*<sup>163(A→T)</sup> variant that leads to uracil auxotrophy, were equally frequent in the  
2 mutants analyzed across different independent experiments (**Fig. 4b** and **4c**). These observations  
3 indicate that the mutator devices seem to mediate changes from a purine nucleotide to another purine  
4 (i.e. A:T ↔ G:C) or a pyrimidine nucleotide to another pyrimidine (C:G ↔ T:A). Accordingly, when the  
5 *pyrF* sequence was analyzed in the few Ura<sup>+</sup> mutants isolated from experiments with the controls  
6 strains, we found a significant enrichment of transversion mutations, e.g. 163(T→G), 164(A→T) and  
7 164(A→C) (**Fig. 4c**). All these revertant (i.e. Ura<sup>+</sup>) clones had a very similar growth phenotype when  
8 grown in M9 minimal medium with glucose as the only carbon source, both when compared to each  
9 other or to their parental strain EM42 (**Fig. S3** in the Supporting Information). Interestingly, we could not  
10 isolate Ura<sup>+</sup> mutants with the wild-type *pyrF* sequence (with a Lys residue at position 55 of PyrF; **Fig.**  
11 **4b**) in any of these experiments. In agreement with our results, Long *et al.*<sup>52</sup> showed that transition  
12 mutations are 16 to 82-fold more abundant than transversions in bacterial strains lacking a functional  
13 MMR system (both *Deinococcus radiodurans* and *P. fluorescens*), in sharp contrast to the mere < 3-fold  
14 found in the wild-type strains (i.e. spontaneously occurring). Horst *et al.*<sup>24</sup> also indicated that DNA  
15 transitions and frameshift mutations were more abundant in *E. coli* cells lacking a functional MMR  
16 system. Regardless of the nature of the mutations introduced by these tools, these experiments show  
17 that the conditional mutator devices can be used to accelerate the emergence of different phenotypes.  
18 However, a major limitation of this set of plasmid-borne devices is the difficulty of curing them from the  
19 target cells, even in the absence of selective pressure. This shortcoming was fixed by constructing a  
20 new generation of 'curable' mutator devices as explained below.

21

22 **Design and validation of a new generation of plasmid-based, easy-to-cure mutator devices for**  
23 **Gram-negative bacteria.** Previous attempts to cure isolated clones from the set of plasmids based on  
24 vectors pSEVA2311 and pSEVA2514 proved unsuccessful, even after >10 repeated passages of  
25 individual colonies under non-selective conditions (data not shown). This situation not only precludes  
26 precise temporal control of the accelerated evolution protocol, but also prevents the precise assessment  
27 of the (potential) occurrence of secondary mutations in the genome that do not have a selectable  
28 phenotype associated to their emergence. In particular, whole-genome sequencing needs to be  
29 performed to study the frequency and nature of mutations arising in conditional mutator strains, as well  
30 as the *global* mutation rates—as opposed to the *local* effects in individual genes that confer a  
31 macroscopic phenotype. Moreover, high-quality readings in whole-genome sequencing cannot be

1 achieved if the cells carry plasmids (that would be co-purified with genomic DNA, and would interfere in  
2 the assembly process). In order to overcome this state of affairs, and due to the tedious work required  
3 to cure the mutator and control plasmids in all the strains previously tested, we decided to build a new  
4 version of easy-to-cure mutator systems using a technology recently developed in our laboratory. This  
5 methodology relies on the target curing of vectors by means of *in vivo* digestion mediated by the I-SceI  
6 homing endonuclease<sup>71</sup>. For this purpose, we constructed vectors pS2311SG, pS2514SG, pS2311SGM  
7 and pS2514SGM by USER assembly (Table 1 and S1). These standardized vectors, which are all  
8 derivatives of pSEVA2311, pSEVA2514, pS2311M and pS2514M, respectively, contain (i) an  
9 engineered I-SceI recognition site that can be recognized and cleaved off by the endonuclease I-SceI of  
10 *Saccharomyces cerevisiae*<sup>72</sup> and (ii) a module for the constitutive expression of *msfGFP* (i.e.  
11  $P_{EMT} \rightarrow msfGFP$ , where the gene encoding the monomeric superfolder GFP is placed under control of  
12 the synthetic  $P_{EMT}$  promoter) (Fig. 5a). This last module facilitates the selection of bacterial clones by  
13 examination of green-fluorescent colonies under blue light during the plasmid curation protocol. To this  
14 end, the accelerated mutagenesis protocol was upgraded by including a plasmid-curing step (Fig. S4 in  
15 the Supporting Information). In this case, isolated clones are transformed with a helper plasmid that  
16 carries the gene encoding the I-SceI endonuclease under control of an inducible expression system.  
17 Loss of the plasmid carrying the mutator device can be easily inspected as the corresponding colonies  
18 will also loss green fluorescence.

19  
20 In these experiments, we firstly subjected the control strains (i.e. *P. putida* KT2440/pS2514SG and  
21 KT2440/pS2311SG) and the conditional mutator strains carrying the new set of plasmids (i.e. *P. putida*  
22 KT2440/pS2514SGM and KT2440/pS2311SGM) to the standard mutagenesis protocol to confirm the  
23 functionality of the easy-to-cure devices (Fig. S4 in the Supporting Information). We investigated the  
24 emergence of Str<sup>R</sup> mutants after implementing the accelerated mutagenesis protocol, and new induction  
25 conditions were tested to further characterize the tools. As expected, most of the recombinant strains  
26 harboring the easy-to-cure plasmids behaved quite similarly to the original strains carrying the first  
27 generation mutator devices (Table S2 in the Supporting Information). The mutation frequency mediated  
28 by the mutator allele under control of the *cl857/P<sub>L</sub>* expression system was essentially identical in all  
29 experiments, irrespective of whether the original or the upgraded set of plasmids was used. We  
30 detected a lower mutation frequency in strain KT2440/pS2311SGM (ca. 60% lower than the values  
31 observed in strain KT2440/pS2311M under similar experimental conditions). Such a trait was

1 consistently accompanied by loss of green fluorescence in a significant proportion of the bacterial  
2 colonies isolated in solid medium, i.e. lysogeny broth (LB) agar, with or without Str supplementation.  
3 This result could be due to multiple factors, e.g. accumulation of loss-of-function mutations in the  
4 *msfGFP* gene stimulated by the same mutator device or unexpected decay or loss of the mutator  
5 plasmid in the absence of selection pressure (i.e. plasmid-borne kanamycin resistance).  
6 To investigate the hypothesis above, we repeated the accelerated mutagenesis protocol with strain  
7 KT2440/pS2311SGM while maintaining kanamycin selection on the plates. We observed that, in the  
8 presence of the selection pressure borne by the mutator plasmid, all the bacterial colonies maintained  
9 green fluorescence and the overall mutagenesis frequencies were significantly higher than in all  
10 previous experiments (e.g. 270-fold higher than in the experiments with the same plasmid but omitting  
11 kanamycin; **Table S2**). Under these experimental conditions, the cyclohexanone-inducible mutator  
12 plasmids appear to exhibit leaky expression of the *mutL*<sup>E36K</sup> allele, which led to similar mutagenesis  
13 frequencies in the absence or presence of inducer (**Table S2**). This observation helps explaining why, in  
14 the absence of selection pressure, some cells may reduce the copy number of the pS2311SGM plasmid  
15 to alleviate the mutagenic effects caused by (semi) constitutive expression of *mutL*<sup>E36K</sup>—or even force  
16 complete plasmid loss in some clones. At the bacterial population level, this phenomenon could further  
17 translate into an overall decrease of the *global* mutagenesis frequency. This behavior was not observed  
18 in strain KT2440/pS2514SGM, which appears to exhibit a lower—but more tightly-regulated—  
19 expression level of the mutator allele than the ChnR/P<sub>chnB</sub> counterpart (**Table S2**). Actually, extending  
20 the thermal induction of the *cl857*/P<sub>L</sub>-based mutator devices from 15 to 30 min did not affect the *global*  
21 mutagenesis frequency. In either case, the genetic upgrading of the plasmid toolbox was meant to  
22 facilitate the easy curing of the mutator devices, and the results of these experiments are explained in  
23 the next section.

24

25 **Easy-to-cure mutator devices enable a tight control of the global mutagenesis and reveal a wide**  
26 **landscape of genome modifications upon accelerated evolution.** We decided to sequence the  
27 whole genome of several colonies isolated in non-selective medium (i.e. LB agar, 2-5 colonies for each  
28 experimental condition) in order to assess the frequency and nature of mutations mediated by the  
29 mutator devices. To this end, green-fluorescent colonies were selected after treatment (**Fig. S4** in the  
30 Supporting Information) and transformed with the helper pQURE6-L plasmid<sup>71</sup>, a conditionally-  
31 replicating vector that requires supplementation of 3-methylbenzoate (3-*mBz*) to the culture medium to

1 ensure plasmid maintenance (**Fig. S5** in the Supporting Information). In particular, plasmid pQURE6-L  
2 carries a synthetic module for the 3-*mBz*-inducible expression of the *I-SceI* endonuclease gene (i.e.  
3 *XylS/Pm*→*I-SceI*; **Table 1**) and a second module for the constitutive expression of *mRFP* (i.e.  
4 *P<sub>14g</sub>*→*mCherry*), which, together, facilitate quick curing of mutator plasmids by positive selection of red-  
5 fluorescent colonies (**Fig. S4** in the Supporting Information; see also *Methods* for details on the curing  
6 procedure). In all cases, the mutator devices could be easily cured upon introduction of plasmid  
7 pQURE6-L. Moreover, this helper plasmid could be typically cured during a simple overnight incubation  
8 of individual colonies in LB medium without 3-*mBz* (data not shown), similarly to the observations  
9 reported by Volke *et al.*<sup>71</sup>

10

11 Multiple colonies were isolated from the accelerated mutagenesis experiments using the upgraded  
12 mutator toolbox and, upon curing all plasmids, genomic DNA was extracted and purified prior to next  
13 generation sequencing. Whole-genome sequencing of genomic DNA enabled a precise elucidation of  
14 the nature of mutations elicited by these devices. In general, whole-genome sequencing data confirmed  
15 our previous findings, as the emergence of transitions was a clear signature of clones carrying the  
16 *mutL<sup>E36K</sup>* allele in different configurations (**Fig. 5b** and **Table S3** in the Supporting Information). These  
17 single-nucleotide polymorphisms were largely non-synonymous, and transversions were observed to be  
18 extremely rare (i.e. 1 transversion per genome in a just a few isolated clones, no different from the  
19 frequency of transversions in any of the control strains). Importantly, the mutator devices also promoted  
20 the emergence of small insertion-deletion mutations (InDel, mostly consisting of 1-2 bp; **Fig. 5b** and  
21 **Table S4** in the Supporting Information). Frameshift insertions were the most abundant type of InDels  
22 detected in the isolated clones. Taken together, and consistently with the results of experiments  
23 reported in the previous section, the detailed exploration of mutations elicited by the cyclohexanone-  
24 inducible mutator devices indicate that this system promotes a nearly-constitutive mutator phenotype.  
25 This feature, in turn, triggers a relatively high mutagenesis frequency over short induction periods—  
26 probably caused by the leakiness observed for this system under these conditions. Finally, the  
27 transcriptional output afforded by the thermoinducible mutator plasmid seemed to be tightly-regulated.  
28 Thus, this device could be applied to long evolutionary experiments that alternate cycles of non-  
29 induction and induction of DNA mutagenesis coupled to selection of target phenotypes.

30

31 **CONCLUSION**

---

1  
2 In this work, we have constructed two synthetic biology devices to control the mutation rate in *P.*  
3 *putida*—and, due to the nature of the vectors used for these constructs, other Gram-negative bacteria  
4 as well—in a precise spatiotemporal fashion. We have interfered with the functioning of the endogenous  
5 MMR machinery by transiently overexpressing the endogenous dominant negative *mutL*<sup>E36K</sup> allele of *P.*  
6 *putida*, thereby increasing mutation frequencies in multiple strains of *P. putida* by 2- to 438-fold under  
7 the conditions tested herein. Following a ‘mutagenesis-followed-by selection’ approach, we have  
8 successfully evolved three separate phenotypes arising from monogenic traits, i.e. resistance to the  
9 antibiotics Str and Rif and uracil prototrophy. Within this approach, we have firstly increased the genetic  
10 diversity in the bacterial population by inducing the activity of the synthetic mutator devices and,  
11 subsequently, isolated mutants onto a selective solid medium. In these experiments, the expression of  
12 the mutator *mutL*<sup>E36K</sup> allele was driven from two inducible modules, i.e. the thermoregulated *cl857/P<sub>L</sub>*  
13 and the cyclohexanone-regulated *ChnR/P<sub>chnB</sub>* expression systems, which have been previously tailored  
14 for heterologous gene expression in different Gram-negative bacterial species. We observed that the  
15 mutation frequencies achieved with the cyclohexanone-inducible mutator devices (i.e. vectors pS2311M  
16 and pS2311SGM, which represent the first and second generation of the tools constructed in this study)  
17 were significantly higher than those obtained with the thermoinducible mutator counterparts (i.e. vectors  
18 pS2514M and pS2514SGM) for most of the experimental conditions tested. In agreement with previous  
19 studies conducted with *E. coli* and related species, we have also observed a higher emergence of  
20 transition and frameshift (InDel) mutations in cells displaying a temporarily-tampered MMR system<sup>24</sup>.

21  
22 Interestingly, the cyclohexanone-triggered mutator devices afforded a significant level of leaky  
23 expression of *mutL*<sup>E36K</sup>, which in turn promoted a nearly-constitutive mutator phenotype that lead to high  
24 mutagenesis rates. The mutation frequencies achieved with this system were, however, lower than  
25 those reported with constitutive mutator strains where the mutator phenotype was originated by  
26 modifications in components of the endogenous MMR system. For example, Kurusu *et al.*<sup>73</sup> reported  
27 that the frequency of occurrence of Rif<sup>R</sup> mutants in a  $\Delta$ *mutS* derivative of *P. putida* KT2440 was 1,000-  
28 fold higher than that in the wild-type strain. Since mutation rates must be precisely controlled to avoid  
29 extensive accumulation of deleterious mutations and to prevent genomic instability, the overexpression  
30 of mutator alleles should be driven from tightly-regulated expression systems (which is always  
31 challenging, irrespective of the bacterial host<sup>74</sup>) or during short periods of time. Thus, the easy-to-cure

1 mutator plasmids developed in this study, which can be rapidly removed from isolated clones displaying  
2 the phenotype of interest, offer a clear advantage over conventional mutator strains—where the mutator  
3 phenotype is elicited by genomic (hence, essentially irreversible) modifications, as epitomized by the  
4 emergence of mutator phenotypes of *P. aeruginosa* in clinically-relevant setups<sup>75-77</sup>. In contrast with the  
5 results of the ChnR/*P<sub>chnB</sub>*-dependent module, the thermoinducible mutator devices allowed for a tightly-  
6 regulated expression of *mutL<sup>E36K</sup>*. This tool may be applied to long evolutionary experiments that  
7 involves alternating cycles of non-induction and induction of mutagenesis coupled to phenotype  
8 selection (e.g. growth-coupled approaches). By modifying the induction conditions and the number of  
9 induction cycles, a landscape of mutation rates could be achieved and adapted to the needs of each  
10 evolutionary experiment. The control of these parameters might be crucial for accelerating the evolution  
11 of complex phenotypes in industrial MCFs, since it has been previously shown that microbial adaptation  
12 to specific stresses is favored with certain mutation rates<sup>78</sup>. Due to its particular metabolic architecture,  
13 this would likely be the case for *P. putida* as well<sup>79</sup>.

14

15 From a more general perspective, it should be noted that the MutL/MutS protein complex of the MMR  
16 machinery appears to be well-conserved in most bacterial species<sup>80-81</sup>. For instance, the MutS protein  
17 from *P. putida* and the MutL protein from *P. aeruginosa* were shown to functionally complement  $\Delta mutS$   
18 and  $\Delta mutL$  mutants of *E. coli* and *Bacillus subtilis*, respectively<sup>73,82</sup>. Therefore, the broad-host-range  
19 mutator devices developed herein are expected to be functional in other bacterial hosts as well. In  
20 addition to their application for the accelerated evolution of phenotypes that depend on multiple  
21 mutations across the bacterial genome, the use of these devices also revealed an important feature of  
22 the MMR system relevant for synthetic biology. A number of genome modification approaches rely on  
23 specifically interfering with the bacterial MMR system to enable strand invasion<sup>51,53,74,83</sup>. Besides the  
24 intended modifications (e.g. as encoded in mutagenic oligonucleotides), there are several secondary  
25 mutations that could occur due to overexpression of mutagenic alleles. The tight spatiotemporal  
26 manipulation of this trait, afforded by the plasmids reported in this study, could enable a more precise  
27 control of genome modifications by restricting the mutation landscape to the intended alterations.

28

## 29 **METHODS**

---

30

1 **Bacterial strains and growth conditions.** The bacterial strains used in this work are listed in **Table 1**.  
2 *E. coli* DH5 $\alpha$  was used for cloning and plasmid maintenance. *E. coli* and *P. putida* strains were routinely  
3 grown in lysogeny broth (LB) medium (10 g L<sup>-1</sup> tryptone, 5 g L<sup>-1</sup> yeast extract and 5 g L<sup>-1</sup> NaCl) at 37°C  
4 and 30°C, respectively, in an orbital shaker at 150 rpm. For mutagenesis experiments, *P. putida* was  
5 grown in M9 minimal medium supplemented with 0.3% (w/v) glucose as the sole carbon source as  
6 indicated in the text. Cyclohexanone was added at 1 mM to cultures for induction of *mutL*<sup>E36K</sup> expression  
7 as necessary. When appropriate, antibiotics were also added at the following concentrations ( $\mu$ g mL<sup>-1</sup>):  
8 gentamicin (Gm) 10; kanamycin (Km), 50; streptomycin (Str), 100; and rifampicin (Rif), 50.  
9 Supplementation of 20  $\mu$ g mL<sup>-1</sup> uracil was implemented to support bacterial growth of uracil-auxotrophic  
10 strains. Bacterial growth was estimated by measuring the optical density at 630 nm (OD<sub>630</sub>).

11  
12 **General DNA manipulations and sequencing.** Molecular biology techniques were performed  
13 essentially as described in standard protocols<sup>84</sup>. Oligonucleotides were purchased from Integrated DNA  
14 Technologies (IDT; Leuven, Belgium) and their sequences are provided in **Table S1** in the Supporting  
15 Information. DNA amplification was performed on a C1000 Touch™ Thermal Cycler (Bio-Rad Corp.,  
16 Hercules, CA, USA) using Phusion *U* Hot Start DNA Polymerase or Phusion Hot Start II DNA  
17 Polymerase from Thermo Fisher Scientific (Waltham, MA, USA). DNA fragments were purified with a  
18 NucleoSpin™ Gel and PCR Clean-up kit (Macherey-Nagel, Düren, Germany). Restriction enzymes and  
19 T4 DNA ligase were obtained from Thermo Fisher Scientific and were used according to the supplier's  
20 specifications. USER assembly was performed essentially as described by Nour-Eldin *et al.*<sup>85</sup> with the  
21 commercial USER enzyme from New England BioLabs (NEB, Ipswich, MA, USA). Plasmid DNA was  
22 prepared with a NucleoSpin™ Plasmid EasyPure kit (Macherey-Nagel). *E. coli* chemical competent cells  
23 were prepared using the *Mix & Go E. coli* Transformation Kit from Zymo Research (Irvine, CA, USA).  
24 DNA amplification from a single colony (i.e. colony PCR) was performed with One *Taq* 2 $\times$  Master Mix  
25 (NEB). Electrocompetent *P. putida* cells were prepared by washing twice an overnight culture of *P.*  
26 *putida* with 300 mM sucrose<sup>86</sup>. All cloned inserts and DNA fragments were confirmed by DNA  
27 sequencing (Eurofins Genomics, Ebersberg, Germany).

28  
29 **Construction of broad-host range mutator expression vectors.** Plasmid pSEVA2514-*rec2*-  
30 *mutL*<sup>E36K</sup>PP, described by Aparicio *et al.*<sup>54</sup>, was double-digested with XbaI and HindIII to obtain a 1.9-kb  
31 DNA fragment corresponding to the dominant-negative mutator allele *mutL*<sup>E36K</sup> of *P. putida* KT2440. The

1 purified DNA fragment was subsequently ligated with the pSEVA2541 and pSEVA2311 vectors,  
2 previously digested with the same restriction enzymes, to generate plasmids pS2514M and pS2311M,  
3 respectively. The easy-to-cure plasmids pS2514SG, pS2514SGM, pS2311SG and pS2311SGM, were  
4 subsequently constructed by USER assembly with the primers indicated in **Table S1**. These vectors  
5 contain an engineered I-*SceI* recognition site and an *msfGFP* gene under the control of the constitutive  
6  $P_{EMT}$  promoter (**Fig. S4** in the Supporting Information), that make them compatible with the plasmid  
7 curation approach recently developed by Volke *et al.*<sup>71</sup>.

8  
9 **Accelerated evolution experiments with *P. putida* recombinant strains carrying mutator**  
10 **plasmids.** Overnight pre-cultures of the conditional mutator strains [e.g. *P. putida*  
11 KT2440/pS2514(SG)M and KT2440/pS2311(SG)M], as well as of their respective control strains [e.g. *P.*  
12 *putida* KT2440/pS2514(SG) and KT2440/pS2311(SG)], were used to inoculate 25 mL of non-selective  
13 M9 minimal medium at an initial OD<sub>600</sub> of 0.075. After 5 h of incubation in an orbital shaker at 30°C  
14 (OD<sub>600</sub> = 0.3), the expression systems were induced thermally (by incubation at 40°C for 15 min in a  
15 water bath) or chemically (with addition of 1 mM cyclohexanone). The cultures were subsequently re-  
16 incubated at 30 °C with shaking and stopped after 1.5 h (early-exponential phase, OD<sub>600</sub> = 0.6), 2 h  
17 (mid-exponential phase, OD<sub>600</sub> = 1) or 24 h (stationary phase, OD<sub>600</sub> = 3). Several aliquots of bacterial  
18 cultures were plated on selective solid medium (e.g. LB agar supplemented with 100 µg mL<sup>-1</sup> Str or with  
19 50 µg mL<sup>-1</sup> Rif as appropriate) to determine the appearance of mutant cells (e.g. Rif<sup>R</sup> or Str<sup>R</sup>) in the  
20 bacterial population. The total number of viable cells in the bacterial population was also estimated by  
21 plating dilutions of the cultures on non-selective medium (e.g. LB agar plates). After 32 h of incubation  
22 at 30 °C, the number of colony forming units (CFUs) in the different culture conditions was estimated by  
23 visual inspection of the plates (see **Fig. S2** in the Supporting Information for an example). At least two  
24 biological replicates and two technical replicates were performed for each bacterial strain and selective  
25 culture condition, respectively.

26  
27 **Vector curing procedure for easy-to-cure plasmids carrying mutator devices.** Overnight pre-  
28 cultures of green-fluorescent colonies isolated from evolution experiments were transformed by  
29 electroporation with plasmid pQURE6-L (**Table 1** and **Fig. S5**). Transformed cells were recovered in LB  
30 medium supplemented with 2 mM 3-*mBz* during 2 h. Dilutions were then plated on LB agar  
31 supplemented with 10 µg mL<sup>-1</sup> Gm and 1 mM 3-*mBz*. Red-fluorescent colonies that had lost the



1 mutator plasmids were easily isolated after 24-48 h of incubation at 30°C. For curing the helper  
2 pQURE6-L plasmid, overnight pre-cultures of red-fluorescent colonies were grown and dilutions were  
3 plated on non-selective medium (e.g. LB agar). Non-fluorescent colonies were selected after 24 h of  
4 incubation and were stored for further analysis. Loss of both plasmids in the selected colonies was  
5 further confirmed by Gm and Km sensitivity (**Fig. S4**).

6  
7 **Genomic DNA purification, library construction, and whole genome sequencing (WGS).** DNA was  
8 purified using the PureLink™ Genomic DNA purification kit (Invitrogen, Waltham, MA, USA) from 2 mL  
9 of overnight LB cultures inoculated from cryostocks prepared after curing the plasmids from the strains.  
10 The genomic DNA of each sample was randomly sheared into short fragments of about 350 bp. The  
11 obtained DNA fragments were subjected to library construction using the *NEBNext*™ DNA Library Prep  
12 Kit (NEB), following the supplier's specifications. Libraries quality control was performed with a Qubit@  
13 2.0 fluorometer and an Agilent™ 2100 BioAnalyzer. Subsequent sequencing was performed using the  
14 Illumina NovaSeq™ 6000 PE150 platform. For quality-control purposes, paired reads with any one of  
15 the following characteristics were discarded: (i) read contains adapter contamination; (ii) uncertain  
16 nucleotides (*N*) constitute >10% of either read; (iii) low quality nucleotides (base quality less than 5, *Q* ≤  
17 5) constitute >50% of either read. Libraries construction, sequencing and subsequent data quality  
18 control was performed by Novogene Co. Ltd. (Cambridge, United Kingdom).

## 19 20 **SUPPORTING INFORMATION**

---

21  
22 **Table S1.** Oligonucleotides used in this work.

23 **Table S2.** Mutation frequencies estimated with the different versions of mutator plasmids created in this  
24 work.

25 **Table S3.** Distribution of single nucleotide polymorphisms (SNP) in evolved populations of *P. putida*.

26 **Table S4.** Distribution of small insertion-deletion (InDel) mutations in evolved populations of *P. putida*.

27 **Figure S1.** Protein sequence alignment of the NH<sub>2</sub>-terminal region of MutL proteins from different  
28 bacteria.

29 **Figure S2.** Appearance of rifampicin- and streptomycin-resistant mutants in populations of *P. putida*  
30 KT2440 carrying a mutator device.

31 **Figure S3.** Growth profile of selected *P. putida* Ura<sup>+</sup> mutants isolated in mutagenesis experiments.

1 **Figure S4.** Upgraded protocol for accelerated evolution of phenotypes using the new generation of  
2 easy-to-cure mutator devices.

3 **Figure S5.** Physical map of the helper pQURE6-L plasmid.

4

## 5 **AUTHOR CONTRIBUTIONS**

---

6

7 L.F.C. and P.I.N. designed the experimental plan and the overall research project. L.F.C. and A.C.  
8 carried the experimental work and drafted the figures and the manuscript, with further contributions by  
9 P.I.N. All authors discussed the results and interpreted the experimental data.

## 10 **ACKNOWLEDGEMENTS**

---

11

12 We thank V. de Lorenzo and his team (CNB-CSIC, Madrid, Spain) for sharing research materials and  
13 for enlightening discussions. The financial support from The Novo Nordisk Foundation (grants  
14 NNF10CC1016517 and *LiFe*, NNF18OC0034818), the Danish Council for Independent Research  
15 (*SWEET*, DFF-Research Project 8021-00039B), and the European Union's Horizon 2020 Research and  
16 Innovation Programme under grant agreement No. 814418 (*SinFonia*) to P.I.N. is gratefully  
17 acknowledged. L.F.C. was supported by the European Union's Horizon 2020 Research and Innovation  
18 Programme under the Marie Skłodowska-Curie grants agreements No. 713683 (*COFUNDfellowsDTU*)  
19 and No. 839839 (*DONNA*).

20

## 21 **CONFLICT OF INTEREST**

---

22

23 The authors declare no financial or commercial conflict of interest.

24

## 25 **REFERENCES**

---

26

- 27 (1) Calero, P., and Nikel, P. I. (2019) Chasing bacterial *chassis* for metabolic engineering: A  
28 perspective review from classical to non-traditional microorganisms. *Microb. Biotechnol.* 12 (1),  
29 98-124.
- 30 (2) Xu, X., Liu, Y., Du, G., Ledesma-Amaro, R., and Liu, L. (2020) Microbial *chassis* development  
31 for natural product biosynthesis. *Trends Biotechnol.* 38 (7), 779-796.

- 1 (3) Chen, Y., Banerjee, D., Mukhopadhyay, A., and Petzold, C. J. (2020) Systems and synthetic  
2 biology tools for advanced bioproduction hosts. *Curr. Opin. Biotechnol.* 64, 101-109.
- 3 (4) Choi, K. R., Jang, W. D., Yang, D., Cho, J. S., Park, D., and Lee, S. Y. (2019) Systems  
4 metabolic engineering strategies: Integrating systems and synthetic biology with metabolic  
5 engineering. *Trends Biotechnol.* 37 (8), 817-837.
- 6 (5) Ko, Y. S., Kim, J. W., Lee, J. A., Han, T., Kim, G. B., Park, J. E., and Lee, S. Y. (2020) Tools  
7 and strategies of systems metabolic engineering for the development of microbial cell factories  
8 for chemical production. *Chem. Soc. Rev.* 49 (14), 4615-4636.
- 9 (6) Fernández-Cabezón, L., Cros, A., and Nikel, P. I. (2019) Evolutionary approaches for  
10 engineering industrially-relevant phenotypes in bacterial cell factories. *Biotechnol. J.* 14 (9),  
11 1800439.
- 12 (7) Gong, Z., Nielsen, J., and Zhou, Y. J. (2017) Engineering robustness of microbial cell factories.  
13 *Biotechnol. J.* 12 (10), 1700014.
- 14 (8) Amoah, J., Kahar, P., Ogino, C., and Kondo, A. (2019) Bioenergy and biorefinery: Feedstock,  
15 biotechnological conversion, and products. *Biotechnol. J.* 14 (6), e1800494.
- 16 (9) Poblete-Castro, I., Wittmann, C., and Nikel, P. I. (2020) Biochemistry, genetics, and  
17 biotechnology of glycerol utilization in *Pseudomonas* species. *Microb. Biotechnol.* 13 (1), 32-53.
- 18 (10) Becker, J., and Wittmann, C. (2019) A field of dreams: Lignin valorization into chemicals,  
19 materials, fuels, and health-care products. *Biotechnol. Adv.* 37 (6), 107360.
- 20 (11) Portnoy, V. A., Bezdán, D., and Zengler, K. (2011) Adaptive laboratory evolution – Harnessing  
21 the power of biology for metabolic engineering. *Curr. Opin. Biotechnol.* 22 (4), 590-594.
- 22 (12) Dragosits, M., and Mattanovich, D. (2013) Adaptive laboratory evolution – Principles and  
23 applications for biotechnology. *Microb. Cell Fact.* 12, 64.
- 24 (13) Winkler, J. D., and Kao, K. C. (2014) Recent advances in the evolutionary engineering of  
25 industrial biocatalysts. *Genomics* 104 (6), 406-411.
- 26 (14) Shepelin, D., Hansen, A. S. L., Lennen, R. M., Luo, H., and Herrgård, M. J. (2018) Selecting the  
27 best: Evolutionary engineering of chemical production in microbes. *Genes* 9 (5), 249.
- 28 (15) Jang, S., Kim, M., Hwang, J., and Jung, G. Y. (2019) Tools and systems for evolutionary  
29 engineering of biomolecules and microorganisms. *J. Ind. Microbiol. Biotechnol.* 46 (9-10), 1313-  
30 1326.

- 1 (16) Sandberg, T. E., Salazar, M. J., Weng, L. L., Palsson, B. Ø., and Feist, A. M. (2019) The  
2 emergence of adaptive laboratory evolution as an efficient tool for biological discovery and  
3 industrial biotechnology. *Metab. Eng.* 56, 1-16.
- 4 (17) Drake, J. W. (1991) A constant rate of spontaneous mutation in DNA-based microbes. *Proc.*  
5 *Natl. Acad. Sci. USA* 88 (16), 7160-7164.
- 6 (18) Lang, G. I., and Murray, A. W. (2008) Estimating the per-base-pair mutation rate in the yeast  
7 *Saccharomyces cerevisiae*. *Genetics* 178 (1), 67-82.
- 8 (19) Swings, T., van den Bergh, B., Wuyts, S., Oeyen, E., Voordeckers, K., Verstrepen, K. J.,  
9 Fauvart, M., Verstraeten, N., and Michiels, J. (2017) Adaptive tuning of mutation rates allows  
10 fast response to lethal stress in *Escherichia coli*. *eLife* 6, e22939.
- 11 (20) Kang, M., Kim, K., Choe, D., Cho, S., Kim, S. C., Palsson, B. Ø., and Cho, B. K. (2019)  
12 Inactivation of a mismatch-repair system diversifies genotypic landscape of *Escherichia coli*  
13 during adaptive laboratory evolution. *Front. Microbiol.* 10, 1845.
- 14 (21) Wang, X., Li, Q., Sun, C., Cai, Z., Zheng, X., Guo, X., Ni, X., Zhou, W., Guo, Y., Zheng, P.,  
15 Chen, N., Sun, J., Li, Y., and Ma, Y. (2019) GREACE-assisted adaptive laboratory evolution in  
16 endpoint fermentation broth enhances lysine production by *Escherichia coli*. *Microb. Cell Fact.*  
17 18 (1), 106.
- 18 (22) Foster, P. L. (1991) *In vivo* mutagenesis. *Methods Enzymol.* 204, 114-125.
- 19 (23) Kodym, A., and Afza, R. (2003) Physical and chemical mutagenesis. *Methods Mol. Biol.* 236,  
20 189-204.
- 21 (24) Horst, J. P., Wu, T. H., and Marinus, M. G. (1999) *Escherichia coli* mutator genes. *Trends*  
22 *Microbiol.* 7 (1), 29-36.
- 23 (25) Schaaper, R. M. (1993) Base selection, proofreading, and mismatch repair during DNA  
24 replication in *Escherichia coli*. *J Biol Chem* 268 (32), 23762-23765.
- 25 (26) Aronshtam, A., and Marinus, M. G. (1996) Dominant negative mutator mutations in the *mutL*  
26 gene of *Escherichia coli*. *Nucleic Acids Res.* 24 (13), 2498-2504.
- 27 (27) Selifonova, O., Valle, F., and Schellenberger, V. (2001) Rapid evolution of novel traits in  
28 microorganisms. *Appl. Environ. Microbiol.* 67 (8), 3645-3649.
- 29 (28) Emlyn-Jones, D., Price, G. D., and Andrews, T. J. (2003) Nitrogen-regulated hypermutator  
30 strain of *Synechococcus* sp. for use in *in vivo* artificial evolution. *Appl. Environ. Microbiol.* 69  
31 (11), 6427-6433.

- 1 (29) Endo, A., Sasaki, M., Maruyama, A., and Kurusu, Y. (2006) Temperature adaptation of *Bacillus*  
2 *subtilis* by chromosomal *groEL* replacement. *Biosci. Biotechnol. Biochem.* 70 (10), 2357-2362.
- 3 (30) Shimoda, C., Itadani, A., Sugino, A., and Furusawa, M. (2006) Isolation of thermotolerant  
4 mutants by using proofreading-deficient DNA polymerase delta as an effective mutator in  
5 *Saccharomyces cerevisiae*. *Genes Genet. Syst.* 81 (6), 391-397.
- 6 (31) Luan, G., Cai, Z., Gong, F., Dong, H., Lin, Z., Zhang, Y., and Li, Y. (2013) Developing  
7 controllable hypermutable *Clostridium* cells through manipulating its methyl-directed mismatch  
8 repair system. *Protein Cell* 4 (11), 854-862.
- 9 (32) Overbeck, T. J., Welker, D. L., Hughes, J. E., Steele, J. L., and Broadbent, J. R. (2017)  
10 Transient MutS-based hypermutation system for adaptive evolution of *Lactobacillus casei* to low  
11 pH. *Appl. Environ. Microbiol.* 83 (20), e01120-01117.
- 12 (33) Kim, S. G., Noh, M. H., Lim, H. G., Jang, S., Jang, S., Koffas, M. A. G., and Jung, G. Y. (2018)  
13 Molecular parts and genetic circuits for metabolic engineering of microorganisms. *FEMS*  
14 *Microbiol. Lett.* 365 (17).
- 15 (34) Nickel, P. I., and de Lorenzo, V. (2018) *Pseudomonas putida* as a functional chassis for  
16 industrial biocatalysis: From native biochemistry to *trans*-metabolism. *Metab. Eng.* 50, 142-155.
- 17 (35) Poblete-Castro, I., Becker, J., Dohnt, K., Martins dos Santos, V. A. P., and Wittmann, C. (2012)  
18 Industrial biotechnology of *Pseudomonas putida* and related species. *Appl. Microbiol.*  
19 *Biotechnol.* 93 (6), 2279-2290.
- 20 (36) Kivisaar, M. (2020) Narrative of a versatile and adept species *Pseudomonas putida*. *J. Med.*  
21 *Microbiol.* 69 (3), 324-338.
- 22 (37) Martínez-García, E., and de Lorenzo, V. (2019) *Pseudomonas putida* in the quest of  
23 programmable chemistry. *Curr. Opin. Biotechnol.* 59, 111-121.
- 24 (38) Calero, P., Volke, D. C., Lowe, P. T., Gottfredsen, C. H., O'Hagan, D., and Nickel, P. I. (2020) A  
25 fluoride-responsive genetic circuit enables *in vivo* biofluorination in engineered *Pseudomonas*  
26 *putida*. *Nat. Commun.* 11 (1), 5045.
- 27 (39) Sánchez-Pascuala, A., Fernández-Cabezón, L., de Lorenzo, V., and Nickel, P. I. (2019)  
28 Functional implementation of a linear glycolysis for sugar catabolism in *Pseudomonas putida*.  
29 *Metab. Eng.* 54, 200-211.

- 1 (40) Sánchez-Pascuala, A., de Lorenzo, V., and Nikel, P. I. (2017) Refactoring the Embden-  
2 Meyerhof-Parnas pathway as a whole of portable *GlucBricks* for implantation of glycolytic  
3 modules in Gram-negative bacteria. *ACS Synth. Biol.* 6 (5), 793-805.
- 4 (41) Martínez-García, E., Aparicio, T., de Lorenzo, V., and Nikel, P. I. (2014) New transposon tools  
5 tailored for metabolic engineering of Gram-negative microbial cell factories. *Front. Bioeng.*  
6 *Biotechnol.* 2, 46.
- 7 (42) Volke, D. C., Turlin, J., Mol, V., and Nikel, P. I. (2020) Physical decoupling of XylS/*Pm*  
8 regulatory elements and conditional proteolysis enable precise control of gene expression in  
9 *Pseudomonas putida*. *Microb. Biotechnol.* 13 (1), 222-232.
- 10 (43) Wirth, N. T., Kozaeva, E., and Nikel, P. I. (2020) Accelerated genome engineering of  
11 *Pseudomonas putida* by I-SceI—mediated recombination and CRISPR-Cas9 counterselection.  
12 *Microb. Biotechnol.* 13, 233-249.
- 13 (44) Durante-Rodríguez, G., de Lorenzo, V., and Nikel, P. I. (2018) A post-translational metabolic  
14 switch enables complete decoupling of bacterial growth from biopolymer production in  
15 engineered *Escherichia coli*. *ACS Synth. Biol.* 7, 2686-2697.
- 16 (45) Kuepper, J., Otto, M., Dickler, J., Behnken, S., Magnus, J., Jäger, G., Blank, L. M., and  
17 Wierckx, N. (2020) Adaptive laboratory evolution of *Pseudomonas putida* and *Corynebacterium*  
18 *glutamicum* to enhance anthranilate tolerance. *Microbiology* 166 (11), 1025-1037.
- 19 (46) Mohamed, E. T., Werner, A. Z., Salvachúa, D., Singer, C. A., Szostkiewicz, K., Jiménez-Díaz,  
20 R. M., Eng, T., Radi, M. S., Simmons, B. A., Mukhopadhyay, A., Herrgård, M. J., Singer, S. W.,  
21 Beckham, G. T., and Feist, A. M. (2020) Adaptive laboratory evolution of *Pseudomonas putida*  
22 KT2440 improves *p*-coumaric and ferulic acid catabolism and tolerance. *Metab. Eng. Commun.*  
23 11, e00143.
- 24 (47) Espeso, D. R., Dvořák, P., Aparicio, T., and de Lorenzo, V. (2020) An automated DIY  
25 framework for experimental evolution of *Pseudomonas putida*. *Microb. Biotechnol.*, DOI:  
26 10.1111/1751-7915.13678.
- 27 (48) Li, W. J., Narancic, T., Kenny, S. T., Niehoff, P. J., O'Connor, K., Blank, L. M., and Wierckx, N.  
28 (2020) Unraveling 1,4-butanediol metabolism in *Pseudomonas putida* KT2440. *Front. Microbiol.*  
29 11, 382.
- 30 (49) Li, W. J., Jayakody, L. N., Franden, M. A., Wehrmann, M., Daun, T., Hauer, B., Blank, L. M.,  
31 Beckham, G. T., Klebensberger, J., and Wierckx, N. (2019) Laboratory evolution reveals the

- 1 metabolic and regulatory basis of ethylene glycol metabolism by *Pseudomonas putida* KT2440.  
2 *Environ. Microbiol.* 21 (10), 3669-3682.
- 3 (50) Bator, I., Wittgens, A., Rosenau, F., Tiso, T., and Blank, L. M. (2019) Comparison of three  
4 xylose pathways in *Pseudomonas putida* KT2440 for the synthesis of valuable products. *Front.*  
5 *Bioeng. Biotechnol.* 7, 480.
- 6 (51) Aparicio, T., Nyerges, A., Nagy, I., Pál, C., Martínez-García, E., and de Lorenzo, V. (2020)  
7 Mismatch repair hierarchy of *Pseudomonas putida* revealed by mutagenic ssDNA  
8 recombineering of the *pyrF* gene. *Environ. Microbiol.* 22 (1), 45-58.
- 9 (52) Long, H., Miller, S. F., Williams, E., and Lynch, M. (2018) Specificity of the DNA mismatch  
10 repair system (MMR) and mutagenesis bias in bacteria. *Mol. Biol. Evol.* 35 (10), 2414-2421.
- 11 (53) Nyerges, Á., Csörgő, B., Nagy, I., Bálint, B., Bihari, P., Lázár, V., Apjok, G., Umenhoffer, K.,  
12 Bogos, B., Pósfai, G., and Pál, C. (2016) A highly precise and portable genome engineering  
13 method allows comparison of mutational effects across bacterial species. *Proc. Natl. Acad. Sci.*  
14 *USA* 113 (9), 2502-2507.
- 15 (54) Aparicio, T., Nyerges, A., Martínez-García, E., and de Lorenzo, V. (2020) High-efficiency multi-  
16 site genomic editing (HEMSE) of *Pseudomonas putida* through thermoinducible ssDNA  
17 recombineering. *iScience* 23 (3), 100946.
- 18 (55) Benedetti, I., Nikel, P. I., and de Lorenzo, V. (2016) Data on the standardization of a  
19 cyclohexanone-responsive expression system for Gram-negative bacteria. *Data in Brief* 6, 738-  
20 744.
- 21 (56) Akkaya, Ö., Pérez-Pantoja, D., Calles, B., Nikel, P. I., and de Lorenzo, V. (2018) The metabolic  
22 redox regime of *Pseudomonas putida* tunes its evolvability toward novel xenobiotic substrates.  
23 *mBio* 9 (4), e01512-01518.
- 24 (57) Aparicio, T., de Lorenzo, V., and Martínez-García, E. (2019) Improved thermotolerance of  
25 genome-reduced *Pseudomonas putida* EM42 enables effective functioning of the P<sub>L</sub>/cI857  
26 system. *Biotechnol. J.* 14 (1), e1800483.
- 27 (58) Benedetti, I., de Lorenzo, V., and Nikel, P. I. (2016) Genetic programming of catalytic  
28 *Pseudomonas putida* biofilms for boosting biodegradation of haloalkanes. *Metab Eng* 33, 109-  
29 118.
- 30 (59) Martínez-García, E., Goñi-Moreno, A., Bartley, B., McLaughlin, J., Sánchez-Sampedro, L.,  
31 Pascual del Pozo, H., Prieto Hernández, C., Marletta, A. S., de Lucrezia, D., Sánchez-

- 1           Fernández, G., Fraile, S., and de Lorenzo, V. (2019) SEVA 3.0: An update of the Standard  
2           European Vector Architecture for enabling portability of genetic constructs among diverse  
3           bacterial hosts. *Nucleic Acids Res* 48 (D1), D1164–D1170.
- 4   (60)   Hosokawa, K., Park, N. H., Inaoka, T., Itoh, Y., and Ochi, K. (2002) Streptomycin-resistant  
5           (*rpsL*) or rifampicin-resistant (*rpoB*) mutation in *Pseudomonas putida* KH146-2 confers  
6           enhanced tolerance to organic chemicals. *Environ. Microbiol.* 4 (11), 703-712.
- 7   (61)   Baltz, R. H. (2014) Spontaneous and induced mutations to rifampicin, streptomycin and  
8           spectinomycin resistances in actinomycetes: mutagenic mechanisms and applications for strain  
9           improvement. *J. Antibiot.* 67 (9), 619-624.
- 10   (62)   Jatsenko, T., Tover, A., Tegova, R., and Kivisaar, M. (2010) Molecular characterization of Rif<sup>R</sup>  
11           mutations in *Pseudomonas aeruginosa* and *Pseudomonas putida*. *Mutat. Res.* 683 (1-2), 106-  
12           114.
- 13   (63)   Miskinyte, M., and Gordo, I. (2013) Increased survival of antibiotic-resistant *Escherichia coli*  
14           inside macrophages. *Antimicrob. Agents Chemother.* 57 (1), 189-195.
- 15   (64)   Ryall, B., Eydallin, G., and Ferenci, T. (2012) Culture history and population heterogeneity as  
16           determinants of bacterial adaptation: the adaptomics of a single environmental transition.  
17           *Microbiol. Mol. Biol. Rev.* 76 (3), 597-625.
- 18   (65)   Galhardo, R. S., Hastings, P. J., and Rosenberg, S. M. (2007) Mutation as a stress response  
19           and the regulation of evolvability. *Crit. Rev. Biochem. Mol. Biol.* 42 (5), 399-435.
- 20   (66)   Kivisaar, M. (2010) Mechanisms of stationary-phase mutagenesis in bacteria: mutational  
21           processes in pseudomonads. *FEMS Microbiol. Lett.* 312 (1), 1-14.
- 22   (67)   Juurik, T., Ilves, H., Teras, R., Ilmjärv, T., Tavita, K., Ukkivi, K., Teppo, A., Mikkil, K., and  
23           Kivisaar, M. (2012) Mutation frequency and spectrum of mutations vary at different  
24           chromosomal positions of *Pseudomonas putida*. *PLoS One* 7 (10), e48511.
- 25   (68)   Long, H., Sung, W., Miller, S. F., Ackerman, M. S., Doak, T. G., and Lynch, M. (2014) Mutation  
26           rate, spectrum, topology, and context-dependency in the DNA mismatch repair-deficient  
27           *Pseudomonas fluorescens* ATCC948. *Genome Biol. Evol.* 7 (1), 262-271.
- 28   (69)   Kivisaar, M. (2020) Mutation and recombination rates vary across bacterial chromosome.  
29           *Microorganisms* 8 (1), 25.



- 1 (70) Aparicio, T., Jensen, S. I., Nielsen, A. T., de Lorenzo, V., and Martínez-García, E. (2016) The  
2 Ssr protein (*T1E\_1405*) from *Pseudomonas putida* DOT-T1E enables oligonucleotide-based  
3 recombineering in platform strain *P. putida* EM42. *Biotechnol. J.* 11, 1309-1319.
- 4 (71) Volke, D. C., Friis, L., Wirth, N. T., Turlin, J., and Nickel, P. I. (2020) Synthetic control of plasmid  
5 replication enables target- and self-curing of vectors and expedites genome engineering of  
6 *Pseudomonas putida*. *Metab. Eng. Commun.* 10, e00126.
- 7 (72) Watabe, H., Iino, T., Kaneko, T., Shibata, T., and Ando, T. (1983) A new class of site-specific  
8 endodeoxyribonucleases. Endo.SceI isolated from a eukaryote, *Saccharomyces cerevisiae*. *J.*  
9 *Biol. Chem.* 258 (8), 4663-4665.
- 10 (73) Kurusu, Y., Narita, T., Suzuki, M., and Watanabe, T. (2000) Genetic analysis of an incomplete  
11 *mutS* gene from *Pseudomonas putida*. *J. Bacteriol.* 182 (18), 5278-5279.
- 12 (74) Lammens, E. M., Nickel, P. I., and Lavigne, R. (2020) Exploring the synthetic biology potential of  
13 bacteriophages for engineering non-model bacteria. *Nat. Commun.* 11, 5294.
- 14 (75) Luján, A. M., Maciá, M. D., Yang, L., Molin, S., Oliver, A., and Smania, A. M. (2011) Evolution  
15 and adaptation in *Pseudomonas aeruginosa* biofilms driven by mismatch repair system-  
16 deficient mutators. *PLoS One* 6 (11), e27842.
- 17 (76) Smania, A. M., Segura, I., Pezza, R. J., Becerra, C., Albesa, I., and Argaraña, C. E. (2004)  
18 Emergence of phenotypic variants upon mismatch repair disruption in *Pseudomonas*  
19 *aeruginosa*. *Microbiology* 150 (Pt 5), 1327-1338.
- 20 (77) Colque, C. A., Albarracín Orio, A. G., Feliziani, S., Marvig, R. L., Tobares, A. R., Johansen, H.  
21 K., Molin, S., and Smania, A. M. (2020) Hypermutator *Pseudomonas aeruginosa* exploits  
22 multiple genetic pathways to develop multidrug resistance during long-term infections in the  
23 airways of cystic fibrosis patients. *Antimicrob. Agents Chemother.* 64 (5), e02142-02119.
- 24 (78) Luan, G., Bao, G., Lin, Z., Li, Y., Chen, Z., Li, Y., and Cai, Z. (2015) Comparative genome  
25 analysis of a thermotolerant *Escherichia coli* obtained by genome replication engineering  
26 assisted continuous evolution (*GREACE*) and its parent strain provides new understanding of  
27 microbial heat tolerance. *New Biotechnol.* 32 (6), 732-738.
- 28 (79) Nickel, P. I., Fuhrer, T., Chavarría, M., Sánchez-Pascuala, A., Sauer, U., and de Lorenzo, V.  
29 (2021) Reconfiguration of metabolic fluxes in *Pseudomonas putida* as a response to sub-lethal  
30 oxidative stress. *ISME J.*, In press, DOI: 10.1038/s41396-41020-00884-41399.

- 1 (80) Castañeda-García, A., Prieto, A. I., Rodríguez-Beltrán, J., Alonso, N., Cantillon, D., Costas, C.,  
2 Pérez-Lago, L., Zegeye, E. D., Herranz, M., Płociński, P., Tonjum, T., García de Viedma, D.,  
3 Paget, M., Waddell, S. J., Rojas, A. M., Doherty, A. J., and Blázquez, J. (2017) A non-canonical  
4 mismatch repair pathway in prokaryotes. *Nat. Commun.* 8, 14246.
- 5 (81) Groothuizen, F. S., and Sixma, T. K. (2016) The conserved molecular machinery in DNA  
6 mismatch repair enzyme structures. *DNA Repair* 38, 14-23.
- 7 (82) Jacquelin, D. K., Filiberti, A., Argaraña, C. E., and Barra, J. L. (2005) *Pseudomonas aeruginosa*  
8 MutL protein functions in *Escherichia coli*. *Biochem. J.* 388 (3), 879-887.
- 9 (83) Nyerges, Á., Csorgó, B., Nagy, I., Latinovics, D., Szamecz, B., Pósfai, G., and Pál, C. (2014)  
10 Conditional DNA repair mutants enable highly precise genome engineering. *Nucleic Acids Res.*  
11 42 (8), e62.
- 12 (84) Green, M. R., and Sambrook, J. (2012) *Molecular cloning: a laboratory manual*. 4th ed.; Cold  
13 Spring Harbor Laboratory Press: Cold Spring Harbor, NY.
- 14 (85) Nour-Eldin, H. H., Geu-Flores, F., and Halkier, B. A. (2010) *USER* cloning and *USER* fusion:  
15 The ideal cloning techniques for small and big laboratories. *Methods Mol. Biol.* 643, 185-200.
- 16 (86) Choi, K. H., Kumar, A., and Schweizer, H. P. (2006) A 10-min method for preparation of highly  
17 electrocompetent *Pseudomonas aeruginosa* cells: application for DNA fragment transfer  
18 between chromosomes and plasmid transformation. *J. Microbiol. Methods* 64, 391-397.
- 19 (87) Meselson, M., and Yuan, R. (1968) DNA restriction enzyme from *E. coli*. *Nature* 217 (5134),  
20 1110-1114.
- 21 (88) Bagdasarian, M., Lurz, R., Rückert, B., Franklin, F. C. H., Bagdasarian, M. M., Frey, J., and  
22 Timmis, K. N. (1981) Specific purpose plasmid cloning vectors. II. Broad host range, high copy  
23 number, RSF1010-derived vectors, and a host-vector system for gene cloning in  
24 *Pseudomonas*. *Gene* 16 (1-3), 237-247.
- 25 (89) Martínez-García, E., Nikel, P. I., Aparicio, T., and de Lorenzo, V. (2014) *Pseudomonas* 2.0:  
26 genetic upgrading of *P. putida* KT2440 as an enhanced host for heterologous gene expression.  
27 *Microb. Cell Fact.* 13 (1), 159.
- 28 (90) Silva-Rocha, R., Martínez-García, E., Calles, B., Chavarría, M., Arce-Rodríguez, A., de las  
29 Heras, A., Páez-Espino, A. D., Durante-Rodríguez, G., Kim, J., Nikel, P. I., Platero, R., and de  
30 Lorenzo, V. (2013) The Standard European Vector Architecture (SEVA): a coherent platform for

1           the analysis and deployment of complex prokaryotic phenotypes. *Nucleic Acids Res.* 41 (D1),  
2           D666-D675.  
3

1 **Table 1. Bacterial strains and plasmids used in this work.**

2

| Bacterial strain                               | Relevant characteristics <sup>a</sup>                                                                                                                                                                                                                                                | Reference                                   |
|------------------------------------------------|--------------------------------------------------------------------------------------------------------------------------------------------------------------------------------------------------------------------------------------------------------------------------------------|---------------------------------------------|
| <i>Escherichia coli</i>                        |                                                                                                                                                                                                                                                                                      |                                             |
| DH5 $\alpha$                                   | Cloning host; F- $\lambda$ - <i>endA1 glnX44(AS) thiE1 recA1 relA1 spoT1 gyrA96(Nal<sup>R</sup>) rfbC1 deoR nupG <math>\Phi</math>80(lacZ<math>\Delta</math>M15) <math>\Delta</math>(argF-lac)U169 hsdR17 rK7(r<sup>-</sup><math>\kappa</math>-m<sup>+</sup><math>\kappa</math>)</i> | Meselson and Yuan <sup>87</sup>             |
| <i>Pseudomonas putida</i>                      |                                                                                                                                                                                                                                                                                      |                                             |
| KT2440                                         | Wild-type strain; derivative of <i>P. putida</i> mt-2 cured of the TOL plasmid pWW0                                                                                                                                                                                                  | Bagdasarian <i>et al.</i> <sup>88</sup>     |
| EM42                                           | Derivative of <i>P. putida</i> KT2440; $\Delta$ prophage1 $\Delta$ prophage2 $\Delta$ prophage3 $\Delta$ prophage4 $\Delta$ Tn7 $\Delta$ endA-1 $\Delta$ endA-2 $\Delta$ hsdRMS $\Delta$ flagellum $\Delta$ Tn4652                                                                   | Martínez-García <i>et al.</i> <sup>89</sup> |
| <i>pyrF</i> HM                                 | Derivative of <i>P. putida</i> EM42; <i>pyrF</i> <sup>Lys55Ter</sup> (A163T)                                                                                                                                                                                                         | Aparicio <i>et al.</i> <sup>70</sup>        |
| <b>Plasmids</b>                                |                                                                                                                                                                                                                                                                                      |                                             |
| pSEVA2311                                      | Standard cyclohexanone-responsive expression vector; Km <sup>R</sup> ; <i>oriV</i> (pBBR1), <i>chnRIP</i> <sub>chnB</sub>                                                                                                                                                            | Benedetti <i>et al.</i> <sup>55</sup>       |
| pSEVA2514                                      | Standard thermo-inducible expression vector; Km <sup>R</sup> ; <i>oriV</i> (RSF1010), <i>cI857/P<sub>L</sub></i>                                                                                                                                                                     | Aparicio <i>et al.</i> <sup>57</sup>        |
| pSEVA2514- <i>rec2-mutL</i> <sup>E36K</sup> PP | Derivative of vector pSEVA2514 carrying the <i>rec2</i> recombinase and the dominant-negative mutator <i>mutL</i> <sup>E36K</sup> allele from <i>P. putida</i>                                                                                                                       | Aparicio <i>et al.</i> <sup>51</sup>        |
| pQURE6-L                                       | Conditionally-replicating vector; derivative of vector pJBSD1 carrying <i>XylS/Pm</i> → <i>I-SceI</i> and <i>P<sub>14g</sub></i> → <i>mCherry</i> ; Gm <sup>R</sup>                                                                                                                  | Volke <i>et al.</i> <sup>71</sup>           |
| pS2311SG                                       | Derivative of vector pSEVA2311 with an engineered <i>I-SceI</i> recognition site for easy vector curing and <i>P<sub>EM7</sub></i> → <i>msfGFP</i>                                                                                                                                   | This work                                   |
| pS2514SG                                       | Derivative of vector pSEVA2514 with an engineered <i>I-SceI</i> recognition site for easy vector curing and <i>P<sub>EM7</sub></i> → <i>msfGFP</i>                                                                                                                                   | This work                                   |
| pS2311M                                        | Derivative of vector pSEVA2311 carrying the dominant-negative mutator <i>mutL</i> <sup>E36K</sup> allele from <i>P. putida</i>                                                                                                                                                       | This work                                   |
| pS2514M                                        | Derivative of vector pSEVA2514 carrying the dominant-negative mutator <i>mutL</i> <sup>E36K</sup> allele from <i>P. putida</i>                                                                                                                                                       | This work                                   |

---

|           |                                                                                                                               |           |
|-----------|-------------------------------------------------------------------------------------------------------------------------------|-----------|
| pS2311SGM | Derivative of vector pS2311SG carrying the dominant-negative mutator <i>mutL</i> <sup>E36K</sup> allele from <i>P. putida</i> | This work |
| pS2514SGM | Derivative of vector pS2514SG carrying the dominant-negative mutator <i>mutL</i> <sup>E36K</sup> allele from <i>P. putida</i> | This work |

---

1

2 <sup>a</sup> Antibiotic markers: Km, kanamycin; Gm, gentamicin; Nal, nalidixic acid.

3

## FIGURE LEGENDS

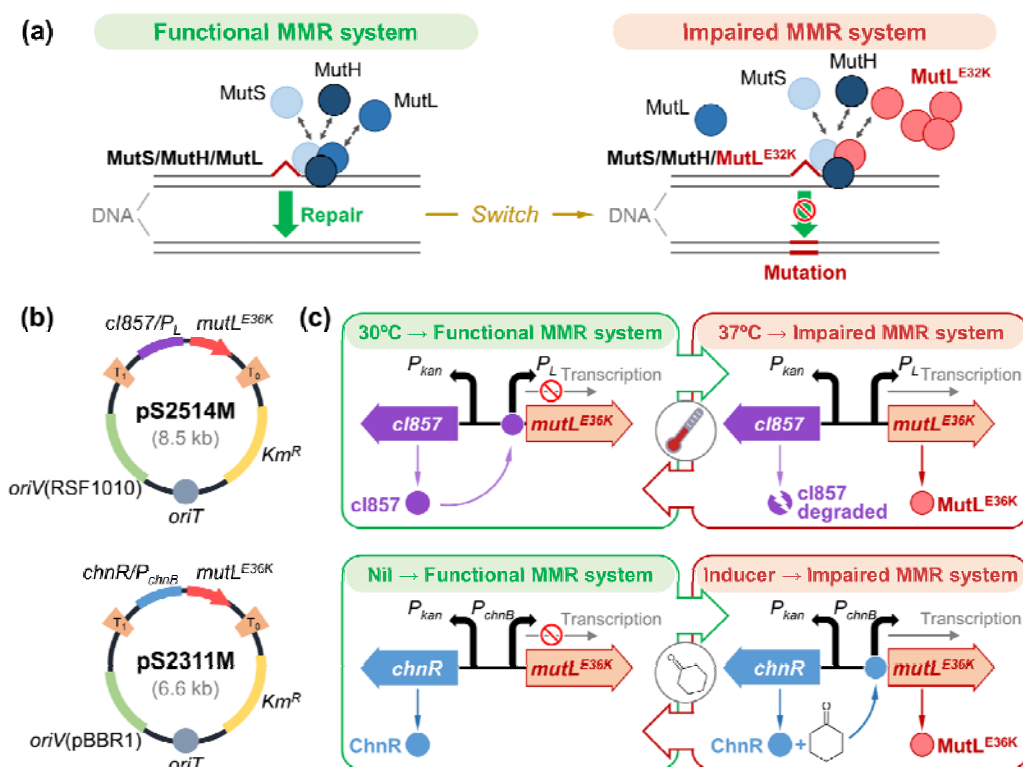

**Figure 1. Construction of broad-host-range mutator devices to conditionally increasing mutation rates in Gram-negative bacteria.** (a) The bacterial DNA mismatch repair (MMR) system recognizes and fixes mutations that arise during DNA replication and recombination. MutS recognizes genomic DNA mismatches and recruits MutL. The MutL/MutS complex activates the MutH endonuclease, which cleaves the newly synthesized, unmethylated daughter strand at the nearest hemimethylated d(GATC) site, and thereby marks it for a removal and a repair-synthesis process that involves a variety of other proteins. Overexpression of the dominant-negative mutator allele *mutL<sup>E32K</sup>* from *E. coli* increases mutation rates<sup>26</sup>. (b) Structure of the two mutator devices used in this work. Plasmids pS2514M and pS2311M, based on the *Standard European Vector Architecture*<sup>90</sup>, were designed for thermo-inducible or cyclohexanone-inducible expression of the mutator allele *mutL<sup>E36K</sup>* from *P. putida*, respectively. Functional elements in the plasmids not drawn to scale; *Km<sup>R</sup>*, kanamycin-resistance marker. (c) Two strategies for tampering with the MMR system of *P. putida*. When using plasmid pS2514M, the temperature-sensitive repressor *cI857* is constitutively produced at 28-32°C and specifically binds to the *P<sub>L</sub>* promoter, mediating transcriptional repression of the gene cloned downstream (i.e. *mutL<sup>E36K</sup>*). By shifting the temperature above 37°C (e.g. 40°C), the expression of

- 1 *mutL*<sup>E36K</sup> takes place due to the denaturation of *cl857*. When using plasmid pS2311M, the ChnR
- 2 transcriptional regulator is constitutively synthesized and binds to the *P<sub>chnB</sub>* promoter in the presence of
- 3 its inducer (cyclohexanone), thus causing the expression of the gene cloned downstream (i.e. *mutL*<sup>E36K</sup>).

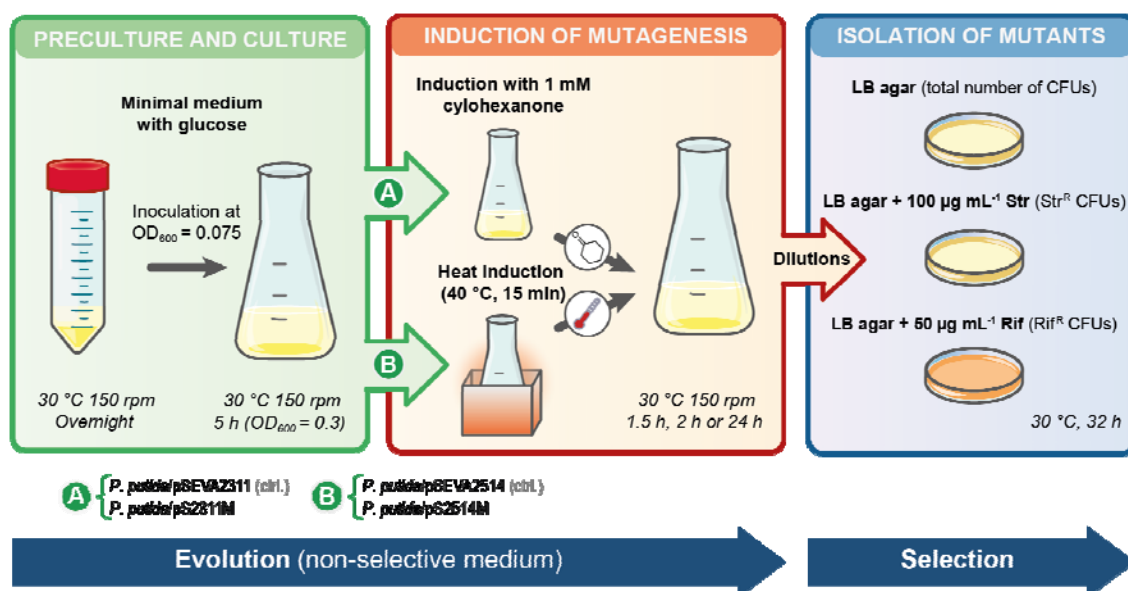

1  
2  
3  
4  
5  
6  
7  
8  
9  
10  
11  
12  
13  
14

**Figure 2. Experimental setup for evolution of *P. putida* strains carrying mutator plasmids.**

Control (ctrl.) strains (i.e. *P. putida* KT2440/pSEVA2514 and KT2440/pSEVA2311, carrying empty vectors) and conditional-mutator strains (i.e. *P. putida* KT2440/pS2514M and KT2440/pS2311M) were incubated in shaken-flask cultures in a non-selective medium [e.g. M9 minimal medium containing 0.3% (w/v) glucose]. After 5 h, when cultures reached an optical density at 600 nm ( $OD_{600}$ ) = 0.3, the expression systems were induced either thermally (incubating the flasks in a water bath) or chemically (adding cyclohexanone to the medium). The cultures were re-incubated at 30°C with shaking and stopped after 1.5 h (early exponential phase,  $OD_{600}$  = 0.6), 2 h (mid-exponential phase,  $OD_{600}$  = 1) or 24 h (stationary phase). Several aliquots cultures were plated onto a selective solid medium [e.g. LB agar supplemented with streptomycin (Str) or rifampicin (Rif)] to assess the appearance of mutants in the bacterial population [e.g. rifampicin- (Rif<sup>R</sup>) or streptomycin-resistant (Str<sup>R</sup>) mutants]. The total number of viable cells in the bacterial cultures was estimated by plating dilutions of the cultures on non-selective solid medium (e.g. LB agar). *CFU*, colony-forming unit.



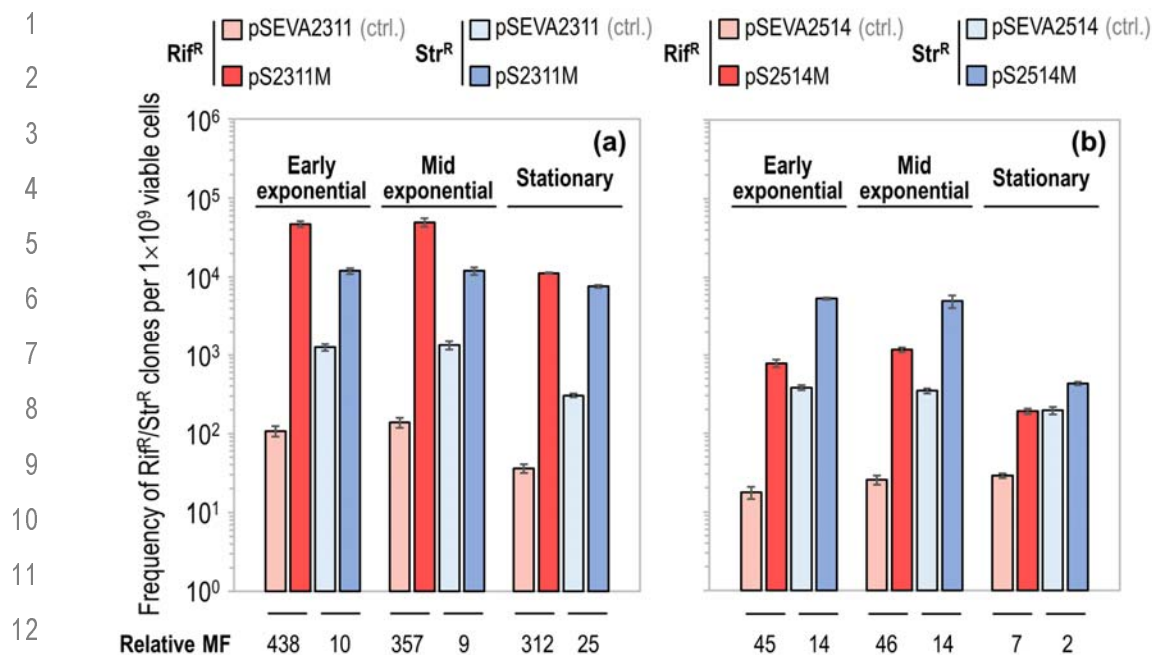

14 **Figure 3. Evolution of antibiotic resistance in *P. putida* using conditional mutator devices.** *P.*  
15 *putida* strains carrying the systems inducible by cyclohexanone (a) and temperature shifts (b) were  
16 evolved by following the mutagenesis protocol described in Fig. 2. Culture aliquots were plated onto  
17 selective medium [i.e. LB agar supplemented with 100 µg mL<sup>-1</sup> streptomycin (Str) or 50 µg mL<sup>-1</sup>  
18 rifampicin (Rif)] to determine the appearance of Rif<sup>R</sup> (Rif<sup>R</sup>) or Str-resistant (Str<sup>R</sup>) mutants in the  
19 population after evolution. The total number of viable cells was estimated by plating dilutions of each of  
20 the cultures onto LB agar plates. Two technical replicates and several dilutions for replicate were  
21 performed for each bacterial strain and per each selective culture condition. Columns represent mean  
22 values of mutation frequencies (MF, expressed as the number of mutant cells per 10<sup>9</sup> viable *P. putida*  
23 cells) from at least two independent experiments ± standard deviation. *Relative mutation frequencies*  
24 were obtained by comparing the mutation frequency of the conditional mutator strain with the respective  
25 control (ctrl.) strain in the same experimental setup (i.e. expressed as fold-change).

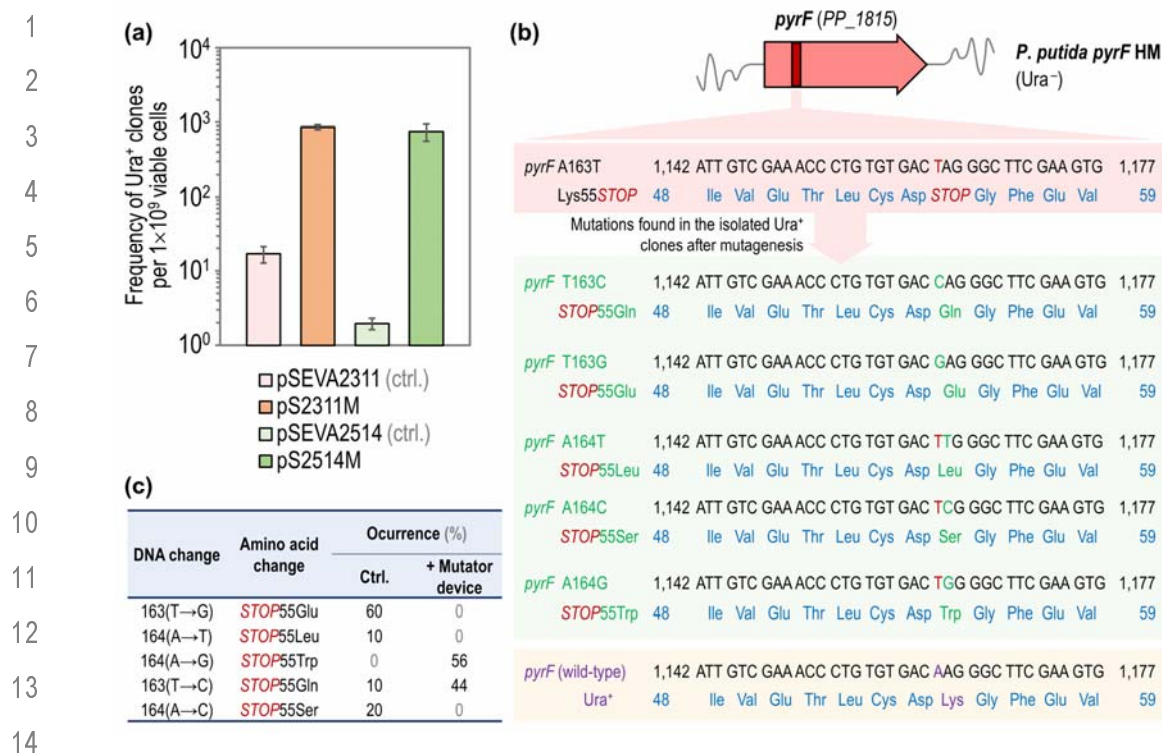

15 **Figure 4. Reversion of the uracil auxotrophy in *P. putida pyrF* using mutator devices.** (a) *P.*  
16 *putida pyrF* HM, carrying the *pyrF*<sup>Lys55STOP</sup> allele that confers uracil auxotrophy (Ura<sup>-</sup>), was transformed  
17 with the two conditional mutator systems (i.e. inducible by cyclohexanone or temperature shifts) or the  
18 corresponding control (ctrl.) vectors, and evolved by following the mutagenesis protocol described in  
19 **Fig. 2**. Several aliquots of these bacterial cultures were plated on selective solid medium (i.e. M9  
20 minimal medium containing glucose as the only carbon source) to estimate the appearance of uracil  
21 prototrophic mutants (Ura<sup>+</sup>) in the population. The total number of viable cells was estimated by plating  
22 dilutions of the same cultures onto M9 minimal medium plates supplemented with glucose and 20 µg  
23 mL<sup>-1</sup> uracil. Two technical replicates and several dilutions for replicate were performed for each  
24 bacterial strain and per each selective culture condition. Columns represent mean values of mutation  
25 frequencies (expressed as the number of mutant cells per 10<sup>9</sup> viable *P. putida pyrF* HM cells) from at  
26 least two independent experiments ± standard deviation. (b) Mutations found in the *pyrF* gene  
27 (*PP\_1815*) in the isolated Ura<sup>+</sup> mutants. (c) Frequency of mutation occurrence in control (ctrl.) and in  
28 the strain carrying the conditional mutator devices. Stop codons are indicated with the abbreviation  
29 *STOP*.

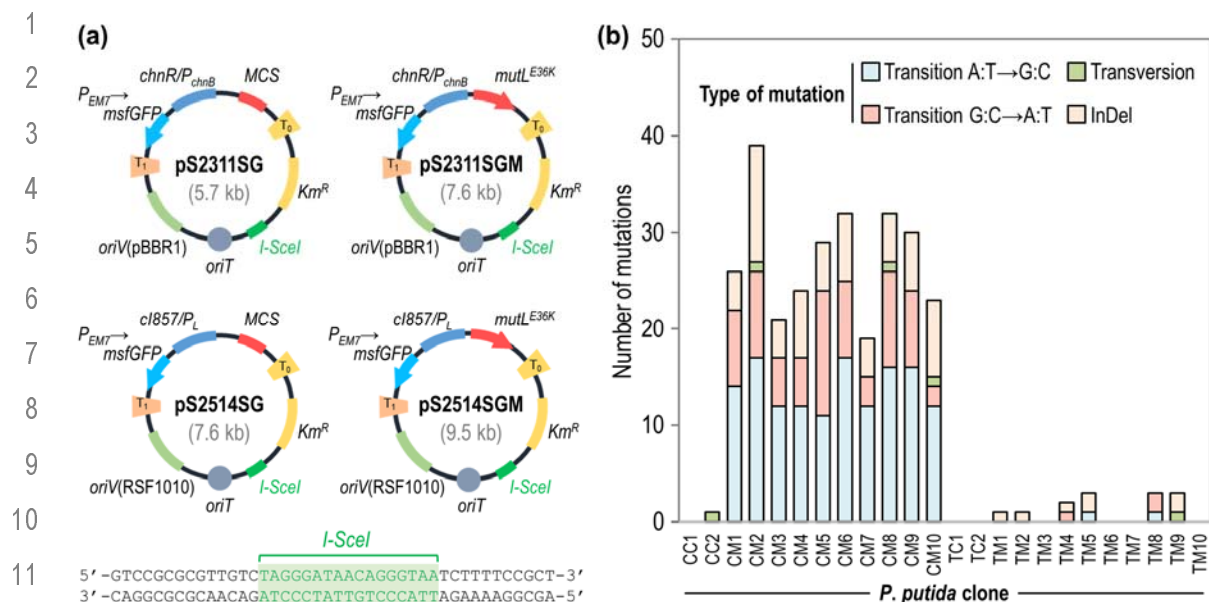

**Figure 5. Design and implementation of a new generation of plasmid-based, easy-to-cure mutator devices for Gram-negative bacteria.** (a) Plasmids pS2311SG, pS2514SG, pS2311SGM and pS2514SGM, derivatives of vectors pSEVA2311, pSEVA2514, pS2311M and pS2514M, respectively, were engineered with a I-SceI recognition site (indicated at the bottom of the figure) to render them compatible with the plasmid curing system based on targeted degradation mediated by the I-SceI endonuclease<sup>71</sup>. These conditional mutator plasmids also carry a synthetic module for the constitutive expression of *msfGFP* (i.e.  $P_{EMT} \rightarrow msfGFP$ ) that facilitate the selection of green fluorescent clones by examination of colonies under blue light. Functional elements in the plasmids not drawn to scale;  $Km^R$ , kanamycin-resistance marker; MCS, standard multiple cloning site. (b) Mutation spectra caused by the mutator devices classified in functional categories. Control strains [i.e. *P. putida* KT2440/pS2514SG (TC) and KT2440/pS2311SG (CC)] and the conditional mutator strains [i.e. *P. putida* KT2440/pS2514SGM (CM) and KT2440/pS2311SGM (TM)] were incubated in shaken-flasks in a non-selective culture medium. After 5 h ( $OD_{600} = 0.3$ ), expression systems were induced thermally (in a water bath at 40°C for 15 min) or chemically (addition of 1 mM cyclohexanone). All cultures (induced and non-induced) were re-incubated at 30°C until reaching an  $OD_{600} = 0.6$ . Several dilutions of the cultures were plated on LB agar for isolation of individual colonies. After curing off the mutator and control (i.e. empty) plasmids from the respective clones, genomic DNA was isolated, sequenced and the readings assembled. The emergence of transition (A:T→G:C; G:C→A:T), transversion (A:T→T:A; G:C→T:A; A:T→C:G; G:C→C:G) and small insertion-deletion (InDel) events (< 50 bp) mutations was

- 1 analyzed in the individual strains. Clones 1-5 and clones 6-10 were obtained from induced and non-
- 2 induced cultures, respectively.
